# Supplementary material for: Molecular isomerization triggered by H2S to an NIR accessible first direct visualization of Ca2+-dependent production in living HeLa cells
Source: Royal Society of Chemistry journal article supplement (doi:10.1039/c9tb01885a), 2019-01-01
Supplement: c9tb01885a1.pdf [file c9tb01885a1.pdf]

## Supporting Information

### **Molecular isomerization triggered by H<sub>2</sub>S to NIR accessible first direct visualization of Ca<sup>2+</sup>-dependent production in living HeLa cells**

Ying Wen,<sup>a</sup> Fangjun Huo,<sup>b</sup> Junping Wang,<sup>a</sup> and Caixia Yin<sup>a\*</sup>

<sup>a</sup> Key Laboratory of Chemical Biology and Molecular Engineering of Ministry of Education, Key Laboratory of Materials for Energy Conversion and Storage of Shanxi Province, Institute of Molecular Science, Shanxi University, Taiyuan 030006, China.

<sup>b</sup> Research Institute of Applied Chemistry, Shanxi University, Taiyuan 030006, China.

## 1. Synthesis route of MB1

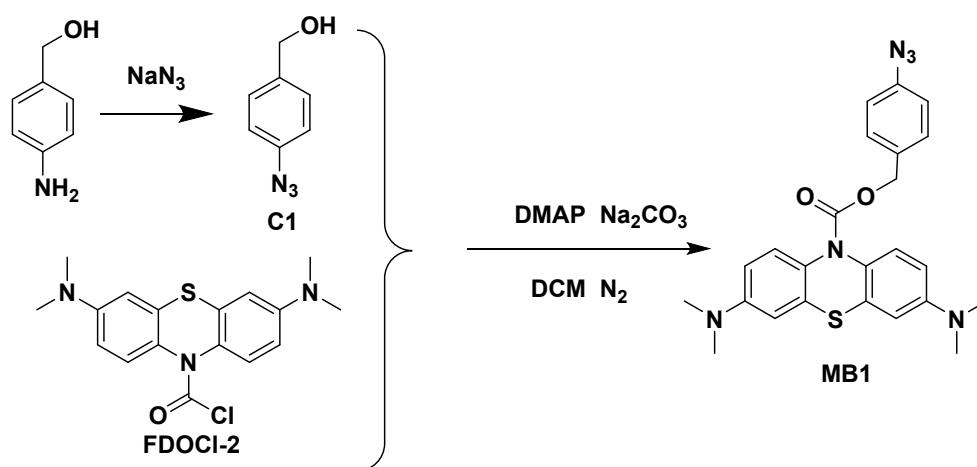

Scheme S1. Synthesis route of MB1.

## 2. The details of characterization of MB1

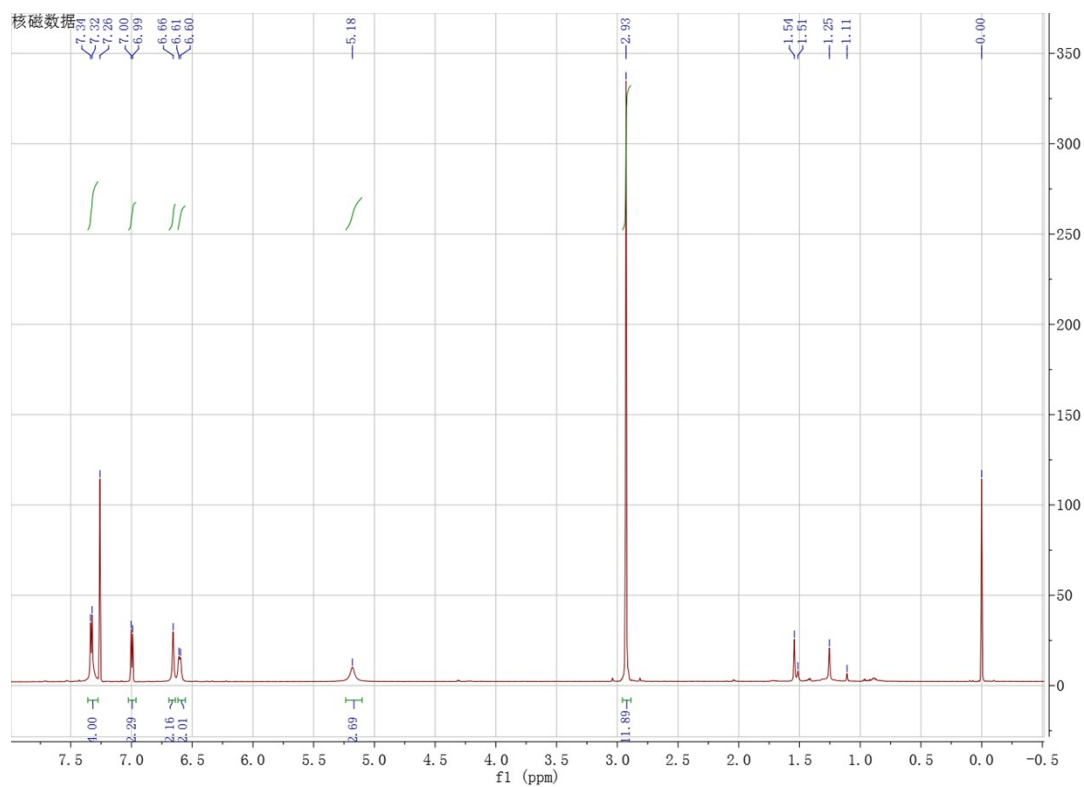

Fig. S1  $^1\text{H}$  NMR spectrum of MB1 in  $\text{CDCl}_3$ .  $^1\text{H}$  NMR (600 MHz,  $\text{CDCl}_3$ )  $\delta$  7.33 (d,  $J = 7.7$  Hz, 4H), 7.00 (d,  $J = 7.8$  Hz, 2H), 6.66 (s, 2H), 6.60 (d,  $J = 7.8$  Hz, 2H), 5.18 (s, 3H), 2.93 (s, 12H).

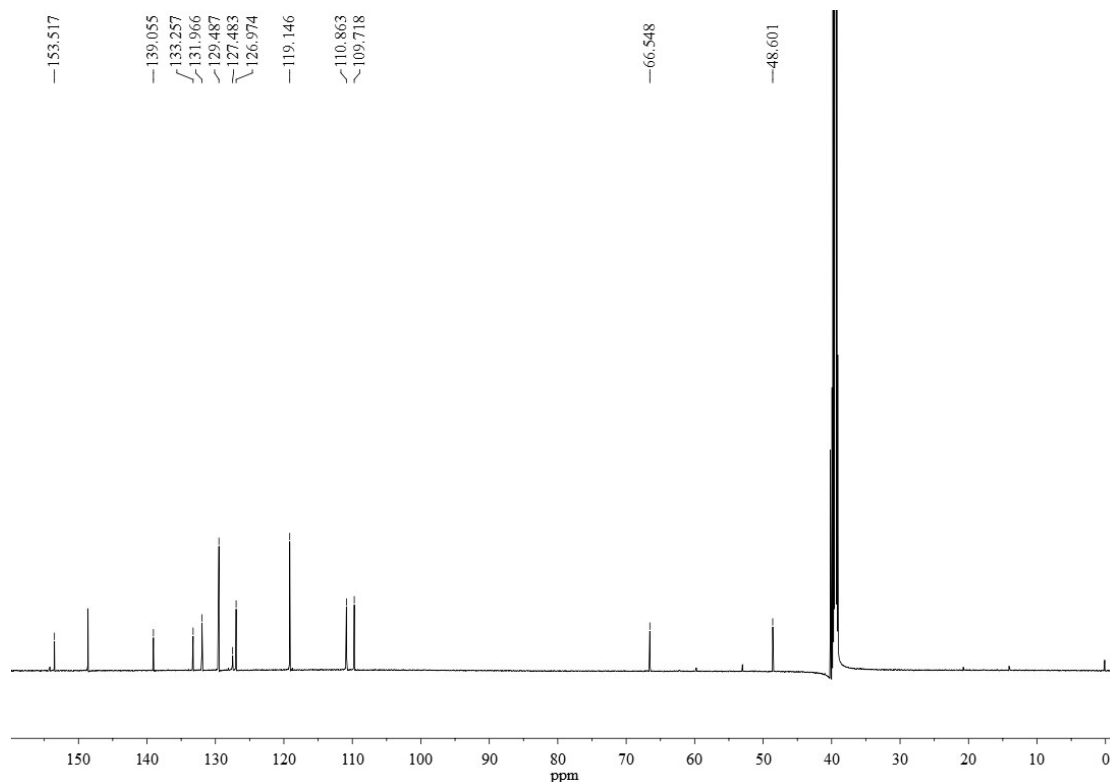

**Fig. S2**  $^{13}\text{C}$  NMR spectrum of **MB1** in DMSO.  $^{13}\text{C}$  NMR (151 MHz, DMSO)  $\delta$  153.52 (s), 139.06 (s), 133.26 (s), 131.97 (s), 129.49 (s), 127.48 (s), 126.97 (s), 119.15 (s), 110.86 (s), 109.72 (s), 66.55 (s), 48.60 (s).

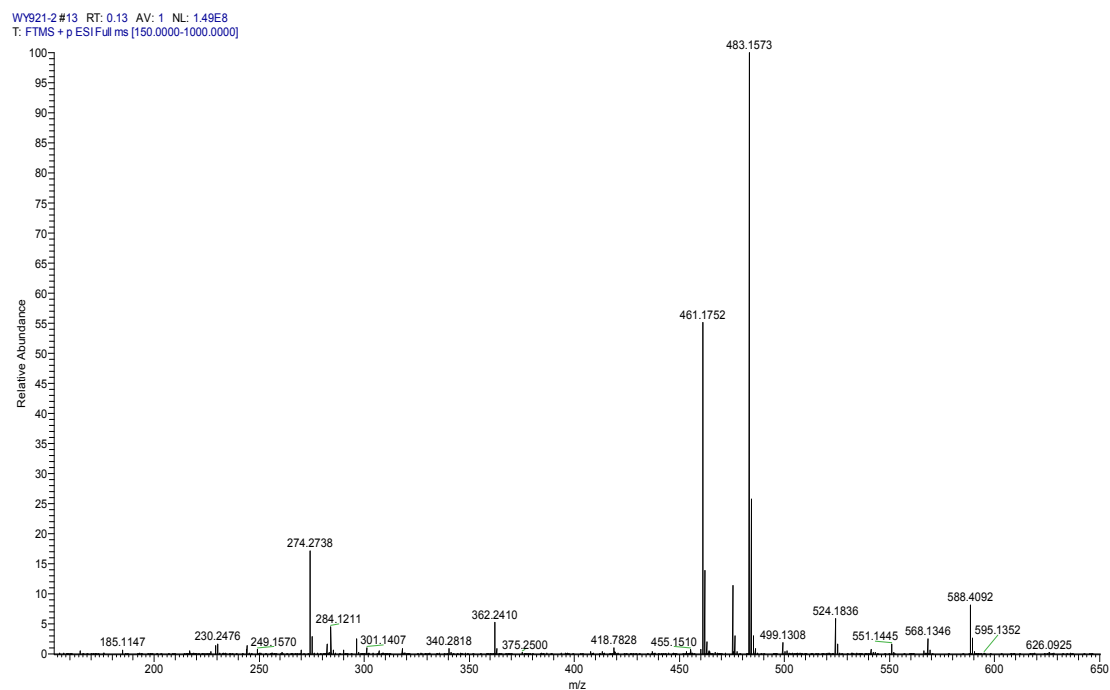

**Fig. S3** HR-MS spectrum of **MB1**: calc. for  $\text{C}_{24}\text{H}_{24}\text{N}_6\text{O}_2\text{SNa}^+ [\text{M}+\text{Na}]^+$  483.1579, found 483.1573.

## 2. Additional data of MB1

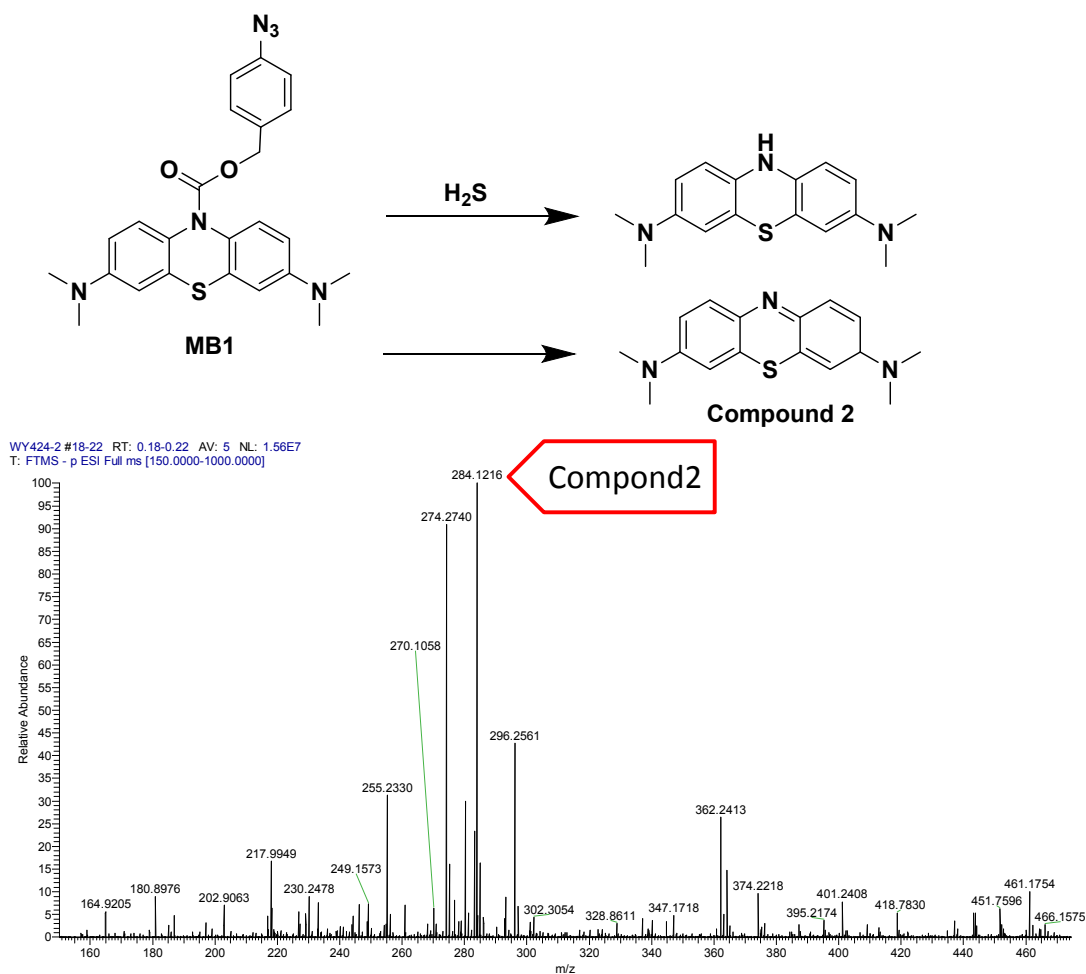

**Fig. S4** HR-MS spectrum of the product after **MB1** reacted with H<sub>2</sub>S: calcd. for C<sub>16</sub>H<sub>18</sub>N<sub>3</sub>S<sup>-</sup> [M-H]<sup>-</sup>, 284.1212; found, 284.1216.

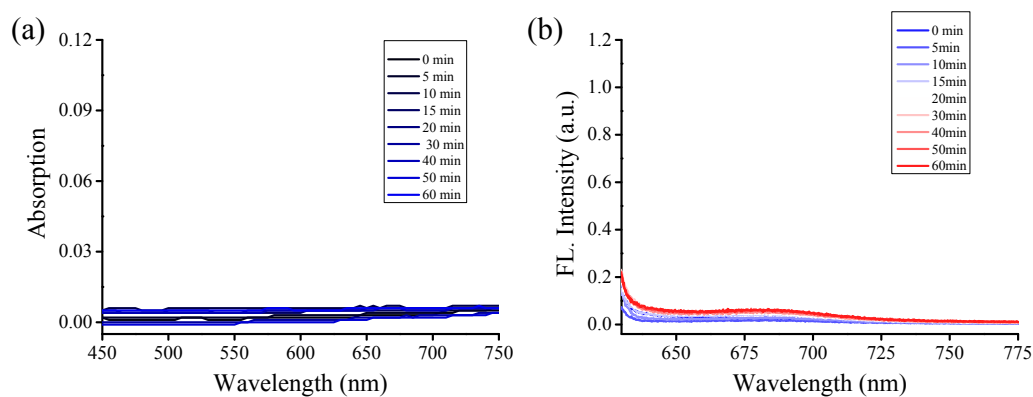

**Fig. S5** Absorption (a) and fluorescence (b) spectral changes of **MB1** (5 μM) over time in a mixed solvent of DMSO and PBS (1:1, v/v).  $\lambda_{\text{ex}} = 600$  nm.

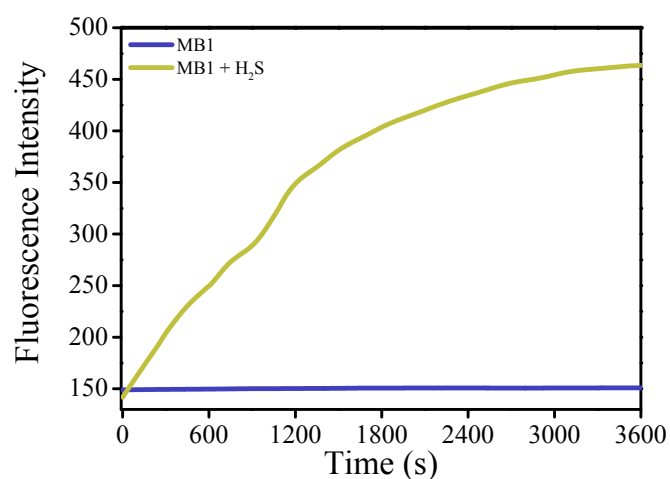

**Fig. S6** Time-dependent fluorescence intensity at 687 nm of **MB1** (5  $\mu$ M, in PBS, 0.25 % DMSO, pH 7.2) without or with 50  $\mu$ M H<sub>2</sub>S,  $\lambda_{\text{ex}}$ =600 nm.

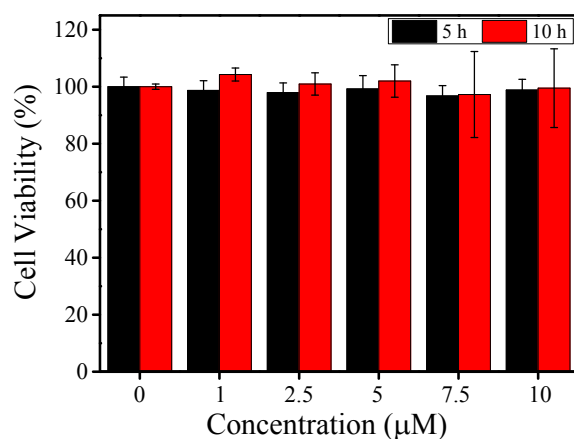

**Fig. S7.** Cell viability values (%) estimated by CCK-8 assay in HeLa cells, which were cultured in the presence of 0-10  $\mu$ M **MB1** for 5 and 10 h.

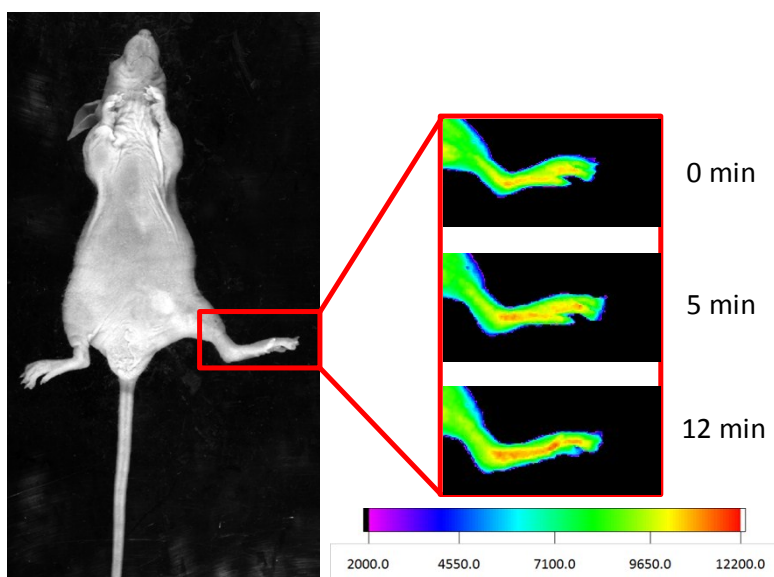

**Fig. S8** *In vivo* fluorescence images of BALB/c Nude Mice after injection **MB1** (1 mM, 50  $\mu$ L) and  $\text{Na}_2\text{S}$  (1 mM, 50  $\mu$ L) into the right tibiotarsal joint (right ankle). The fluorescence signal was collected at  $\lambda_{\text{em}} = 720 \pm 60$  nm under an excitation filter 630 nm.

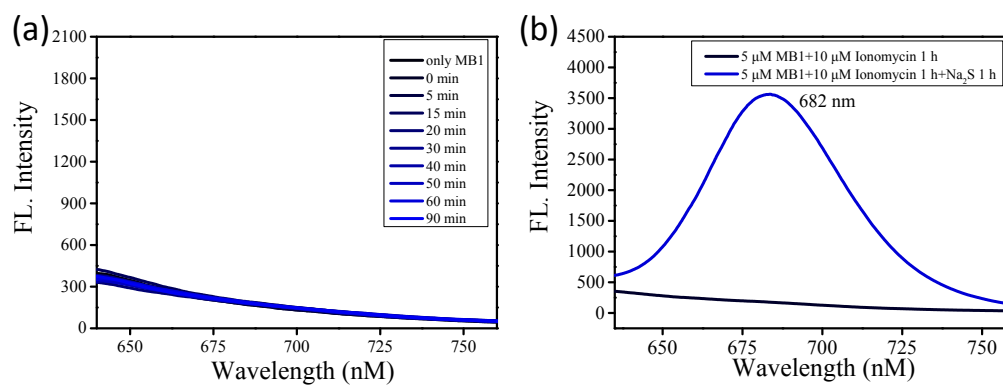

**Fig. S9** (a) Fluorescence spectral changes of **MB1** (5  $\mu$ M) with time after addition of Ionomycin (10  $\mu$ M) in a mixed solvent of DMSO and PBS (1:1, v/v). (b) Fluorescence spectral changes of the mixture of **MB1** (5  $\mu$ M) and Ionomycin (10  $\mu$ M) after addition of Ionomycin (10  $\mu$ M) in a mixed solvent of DMSO and PBS (1:1, v/v) for 0 min and 1 h.  $\lambda_{\text{ex}} = 600$  nm.

Ionomycin(-) group

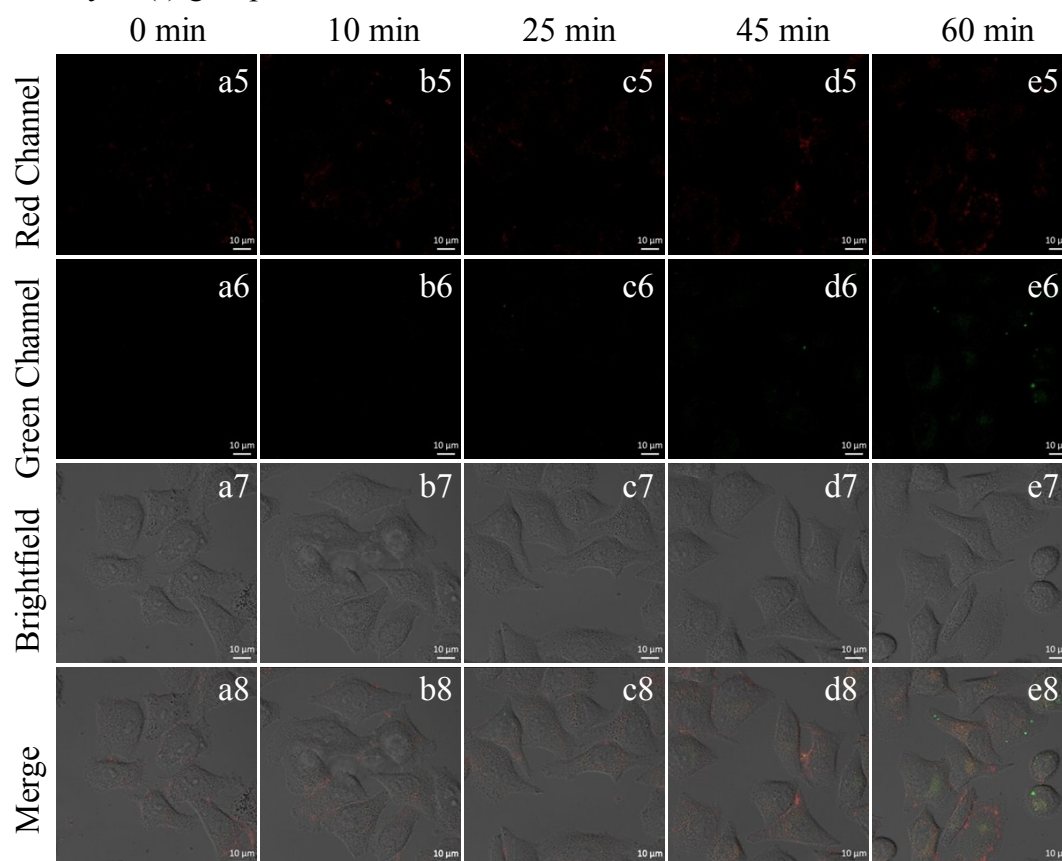

**Fig. S10** CLSM images of **MB1** (5  $\mu$ M) and **Fluo-3 AM** (1  $\mu$ M)-loaded HeLa cells incubated without ionomycin (1  $\mu$ M). The control group of ionomycin-treated cells for different time, shown in Figure 4A. Red channel,  $690 \pm 30$  nm;  $\lambda_{\text{ex}} = 633$  nm for **MB1**; Green channel,  $525 \pm 25$  nm;  $\lambda_{\text{ex}} = 488$  nm for Fluo-3 AM; Scale bar = 10  $\mu$ m.

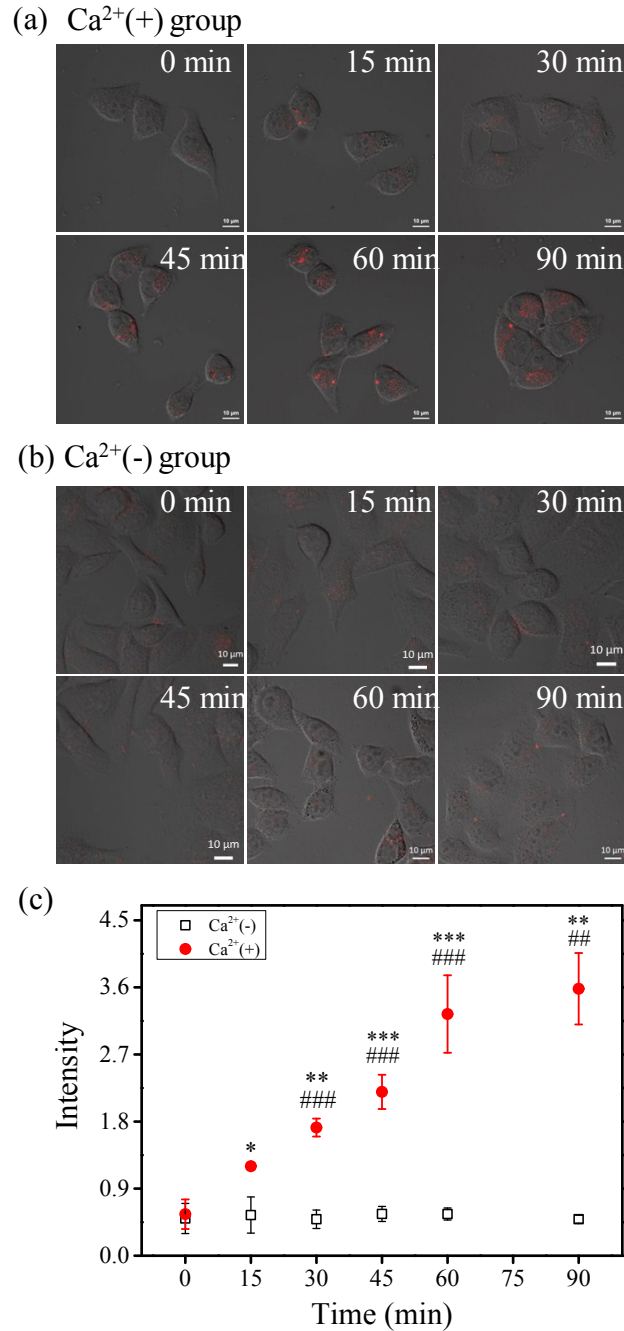

**Fig. S11** CLSM images of **MB1** (5  $\mu\text{M}$ )-loaded HeLa cells. The cells were preincubated with (a) or without (b)  $\text{CaCl}_2$  (200  $\mu\text{M}$ ) for 0 min, 15 min, 30 min, 45 min, 60 min and 90 min. Red channel,  $690 \pm 30$  nm;  $\lambda_{\text{ex}} = 633$  nm for **MB1**; Scale bar = 10  $\mu\text{m}$ . (c) Corresponding average fluorescence intensities of cells in (a) and (b). Statistical analyses were employed with Student's  $t$ -test ( $n = 3$ ). Compared with 0 min group: \* $p < 0.05$ , \*\* $p < 0.01$  and \*\*\* $p < 0.001$ . Compared with  $\text{Ca}^{2+}(-)$  group: ## $p < 0.01$ , ### $p < 0.001$  and error bars are  $\pm$  S.D.
